# Supplementary material
Source: Springer Nature journal article supplement (https://www.springermedizin.de/resource/supplementary/12889_2010_2616_MOESM9_ESM.pdf/9486736)

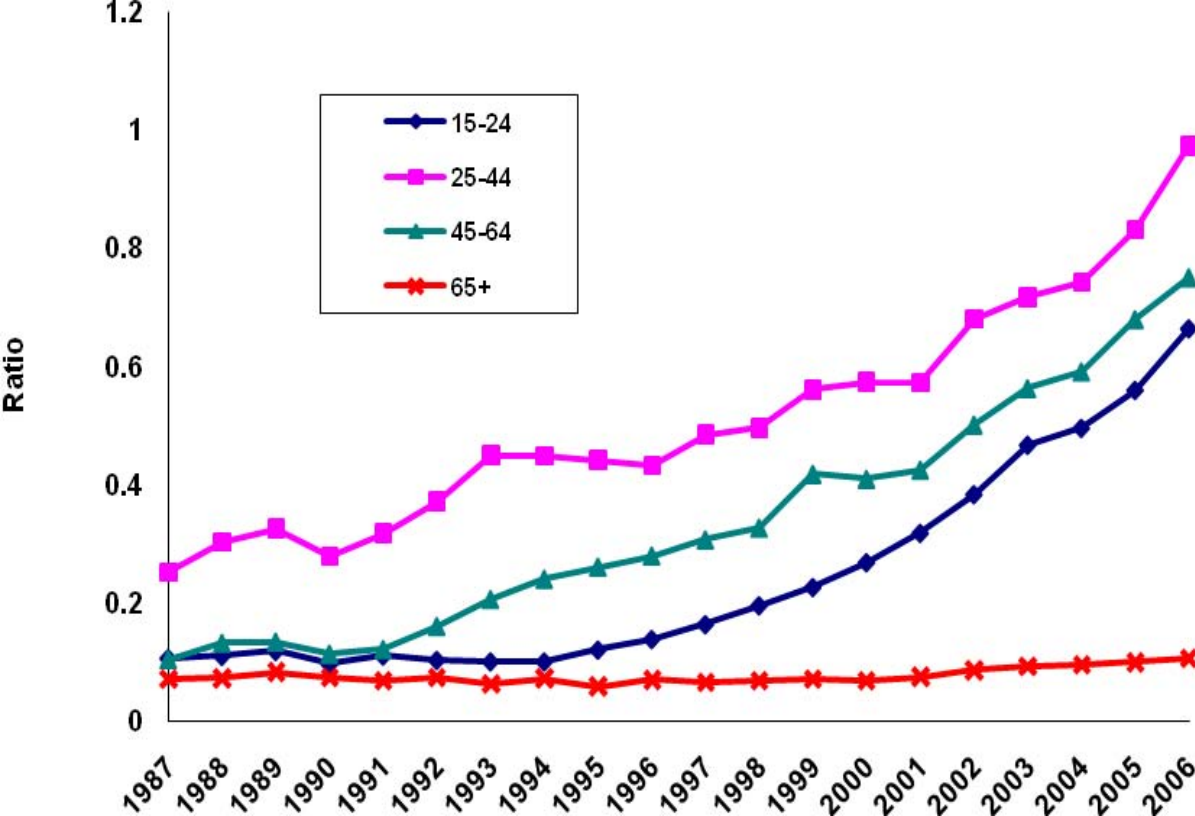

Supplement: MOESM9 [file 9486736]
